# Supplementary material for: A cobalt(ii) coordination polymer with 6-aminonicotinate and 1,2-bis(4-pyridyl)ethane as a new electrochemical sensor for determination of dopamine
Source: Royal Society of Chemistry journal article supplement (doi:10.1039/d3nj02486e), 2023-01-01
Supplement: d3nj02486e1.pdf [file d3nj02486e1.pdf]

## Supplementary Materials

### **Cobalt(II) coordination polymer with 6-aminonicotinate and 1,2-bis(4-pyridyl)ethane as a new electrochemical sensor for determination of dopamine**

Boris-Marko Kukovec,<sup>a</sup> Ivana Škugor Rončević,<sup>\*b</sup> Nives Vladislavić,<sup>b</sup> Nabanita Chatterjee,<sup>c</sup> Vesna Sokol<sup>a</sup> and Clive L. Oliver,<sup>\*c</sup>

<sup>a</sup>*Department of Physical Chemistry, Faculty of Chemistry and Technology, University of Split, Ruđera Boškovića 35, 21000 Split, Croatia*

<sup>b</sup>*Department of General and Inorganic Chemistry, Faculty of Chemistry and Technology, University of Split, Ruđera Boškovića 35, 21000 Split, Croatia*

<sup>c</sup>*Department of Chemistry, University of Cape Town, Rondebosch 7701, South Africa*

#### **\*Corresponding authors:**

I. Škugor Rončević  
e-mail: skugor@ktf-split.hr

C. L. Oliver  
e-mail: clive.oliver@uct.ac.za

## 1. Crystal structures

**Table S1.** Selected bond lengths (Å) and angles (°) for  $\{[\text{Co}(\text{1,2-bpe})_2(\text{H}_2\text{O})_2](6\text{-NH}_2\text{nic})(\text{NO}_3)\cdot 4\text{H}_2\text{O}\}_n$  (**1**).

| <b>1</b>                              |          |
|---------------------------------------|----------|
| <i>Bond lengths</i>                   |          |
| Co1–N1                                | 2.138(3) |
| Co1–N2 <sup>i</sup>                   | 2.170(3) |
| Co1–N3                                | 2.134(3) |
| Co1–N4 <sup>ii</sup>                  | 2.169(4) |
| Co1–O1                                | 2.096(3) |
| Co1–O2                                | 2.128(3) |
| <i>Bond angles</i>                    |          |
| O1–Co1–O2                             | 177.6(1) |
| O1–Co1–N3                             | 91.1(1)  |
| O2–Co1–N3                             | 89.7(1)  |
| O1–Co1–N1                             | 88.6(1)  |
| O2–Co1–N1                             | 90.6(1)  |
| N3–Co1–N1                             | 179.4(2) |
| O1–Co1–N4 <sup>ii</sup>               | 90.5(1)  |
| O2–Co1–N4 <sup>ii</sup>               | 87.2(1)  |
| N3–Co1–N4 <sup>ii</sup>               | 90.4(1)  |
| N1–Co1–N4 <sup>ii</sup>               | 89.1(1)  |
| O1–Co1–N2 <sup>i</sup>                | 91.2(1)  |
| O2–Co1–N2 <sup>i</sup>                | 91.1(1)  |
| N3–Co1–N2 <sup>i</sup>                | 87.3(1)  |
| N1–Co1–N2 <sup>i</sup>                | 93.2(1)  |
| N4 <sup>ii</sup> –Co1–N2 <sup>i</sup> | 177.1(1) |

Symmetry codes (i):  $x, y-1, z$  and (ii):  $x, y+1, z$ .

**Table S2.** The hydrogen bond geometry for  $\{[\text{Co}(1,2\text{-bpe})_2(\text{H}_2\text{O})_2](6\text{-NH}_2\text{nic})(\text{NO}_3)\cdot 4\text{H}_2\text{O}\}_n$  (1).

| D–H...A        | $d(\text{D–H})/\text{\AA}$ | $d(\text{H...A})/\text{\AA}$ | $d(\text{D...A})/\text{\AA}$ | $\angle(\text{D–H...A})/^\circ$ | Symmetry code on A |
|----------------|----------------------------|------------------------------|------------------------------|---------------------------------|--------------------|
| N6–H61...O8    | 0.88(1)                    | 2.07(2)                      | 2.895(5)                     | 157(4)                          | x, y-1, z          |
| N6–H62...O7    | 0.88(1)                    | 2.35(3)                      | 3.163(5)                     | 156(5)                          | x+1/2, -y+1, z     |
| O1–H11...O11   | 0.84(1)                    | 1.83(2)                      | 2.658(4)                     | 175(5)                          | x, y, z            |
| O1–H12...O3    | 0.83(1)                    | 1.88(2)                      | 2.692(4)                     | 164(5)                          | -x+3/2, y, z+1/2   |
| O2–H21...O6    | 0.84(1)                    | 1.90(2)                      | 2.723(4)                     | 169(4)                          | x, y, z            |
| O2–H22...O4    | 0.84(1)                    | 1.83(2)                      | 2.665(4)                     | 171(4)                          | x, y, z            |
| O8–H81...O3    | 0.84(1)                    | 1.82(2)                      | 2.659(5)                     | 175(5)                          | x, y, z            |
| O8–H82...O2    | 0.84(1)                    | 2.36(3)                      | 3.072(5)                     | 143(4)                          | x, y, z            |
| O9–H91...O6    | 0.84(2)                    | 1.98(2)                      | 2.798(5)                     | 166(5)                          | x, y, z            |
| O9–H92...N5    | 0.84(2)                    | 2.03(2)                      | 2.874(5)                     | 175(6)                          | x-1/2, -y+1, z     |
| O10–H101...O4  | 0.84(1)                    | 2.07(2)                      | 2.904(4)                     | 175(5)                          | -x+1, -y+1, z+1/2  |
| O10–H102...O9  | 0.84(1)                    | 1.96(2)                      | 2.776(5)                     | 165(5)                          | -x+1, -y+1, z+1/2  |
| O11–H111...O7  | 0.83(1)                    | 1.96(2)                      | 2.778(4)                     | 168(5)                          | -x+1, -y+2, z+1/2  |
| O11–H112...O10 | 0.83(1)                    | 1.92(2)                      | 2.732(4)                     | 164(5)                          | x, y, z            |
| C2–H2...N6     | 0.95                       | 2.62                         | 3.539(6)                     | 163                             | x-1/2, -y+1, z     |
| C10–H10...O4   | 0.95                       | 2.36                         | 3.282(5)                     | 163                             | x, y+1, z          |
| C11–H11A...O11 | 0.95                       | 2.41                         | 3.355(6)                     | 173                             | x, y+1, z          |
| C24–H24...O6   | 0.95                       | 2.49                         | 3.428(5)                     | 168                             | -x+3/2, y-1, z+1/2 |

**Table S3.** The application of GCE modified with polymer **1** for determination of dopamine (n = 3) in urine sample.

| Sample no. | Added sample      | Added standard DA ( $\mu\text{mol L}^{-1}$ ) | Peak current ( $\mu\text{A}$ ) | Found ( $\mu\text{mol L}^{-1}$ ) | Recovery (%) | RSD (%) |
|------------|-------------------|----------------------------------------------|--------------------------------|----------------------------------|--------------|---------|
| 1          | 100 $\mu\text{L}$ | -                                            | 23.81                          |                                  |              | 1.8     |
| 2          |                   | 1                                            | 24.62                          | 1.51                             | 73.39        | 1.6     |
| 3          |                   | 2                                            | 26.03                          | 2.80                             | 100.92       | 0.3     |
| 4          |                   | 3                                            | 27.08                          | 3.72                             | 97.86        | 0.5     |
| 5          |                   | 4                                            | 27.70                          | 4.36                             | 89.45        | 0.7     |

(Content of the sample found  $0.78 \mu\text{mol L}^{-1}$ ;  $0.119 \text{ mg/L}$ )

## 2. IR spectra

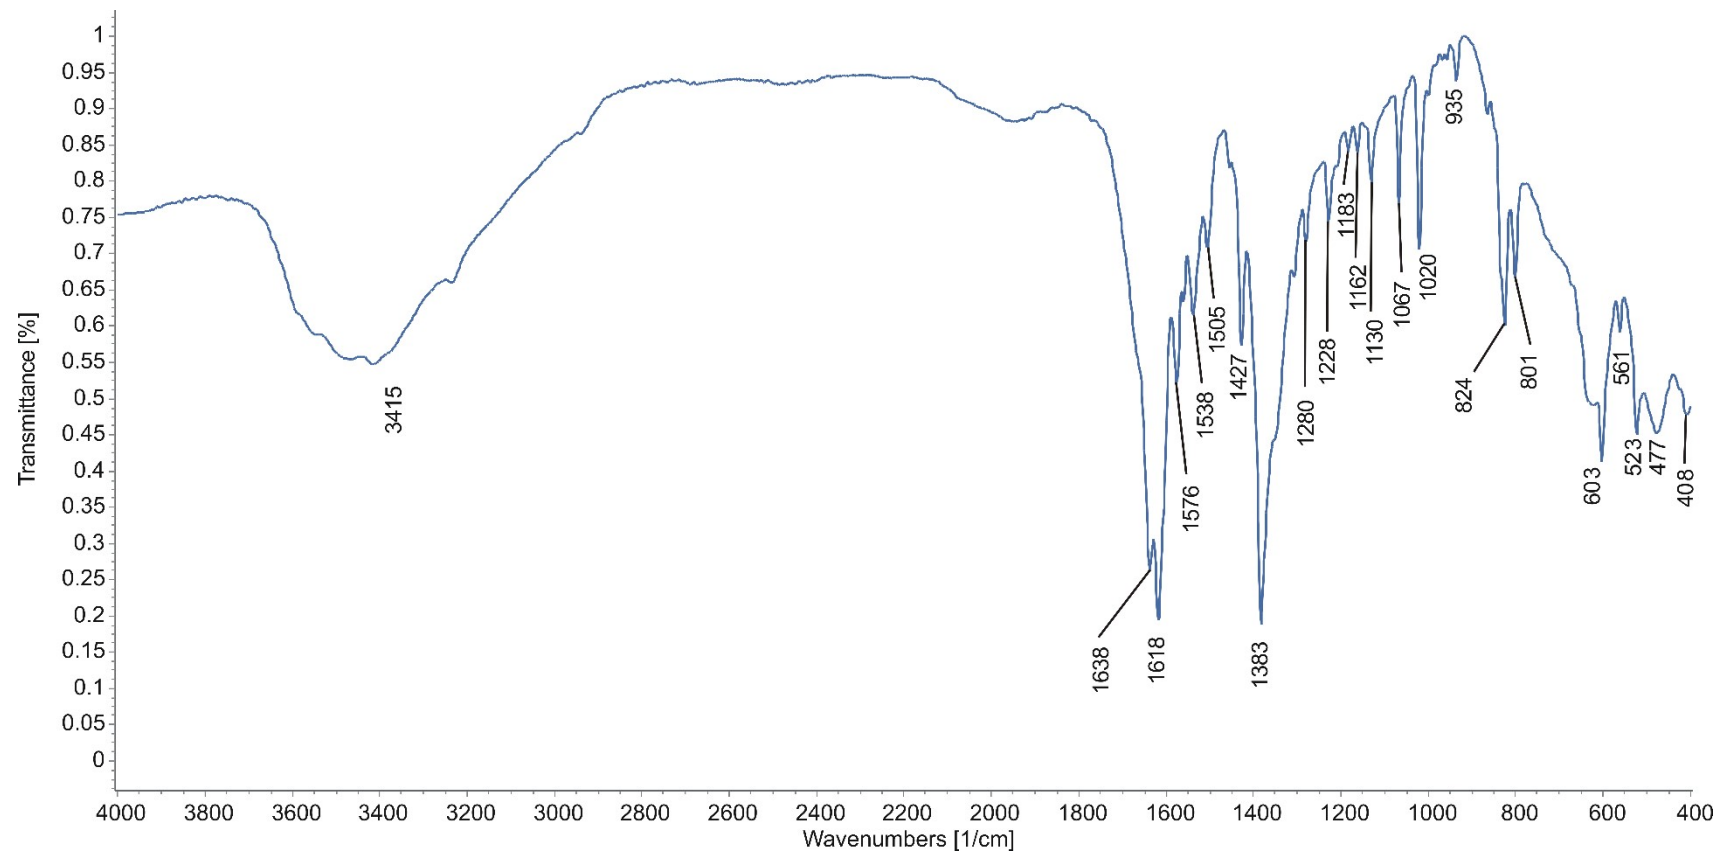

**Figure S1.** IR spectrum of  $\{[\text{Co}(1,2\text{-bpe})_2(\text{H}_2\text{O})_2](6\text{-NH}_2\text{nic})(\text{NO}_3)\cdot 4\text{H}_2\text{O}\}_n$  (**1**).

### 3. TGA/DSC curves

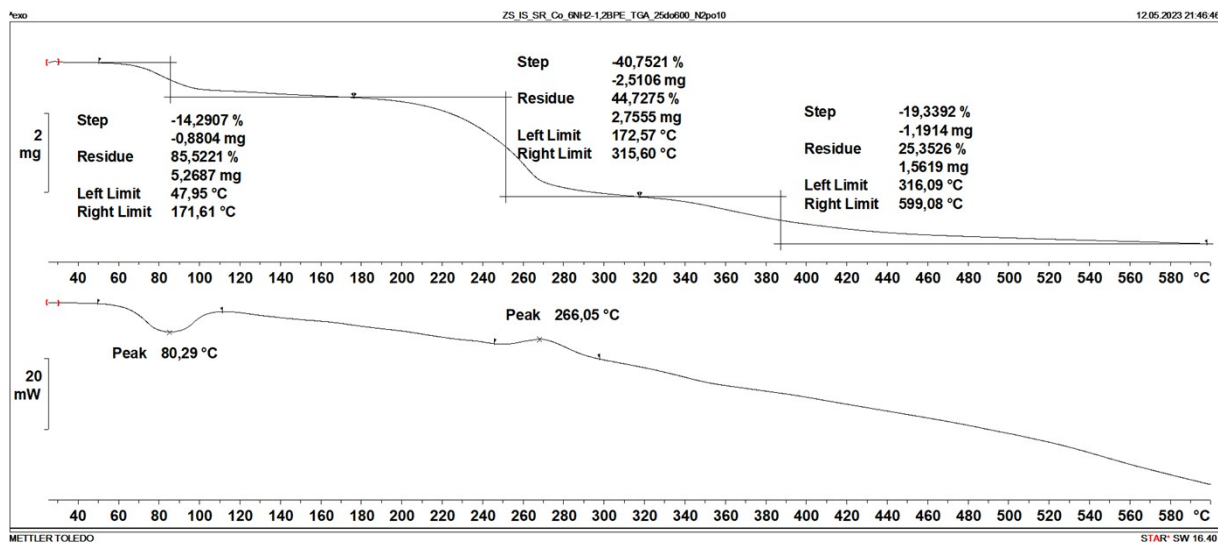

**Figure S2.** TGA/DSC curves of  $\{[\text{Co}(\text{1,2-bpe})_2(\text{H}_2\text{O})_2](\text{6-NH}_2\text{nic})(\text{NO}_3)\cdot 4\text{H}_2\text{O}\}_n$  (**1**).



#### 4. Electrochemical measurements

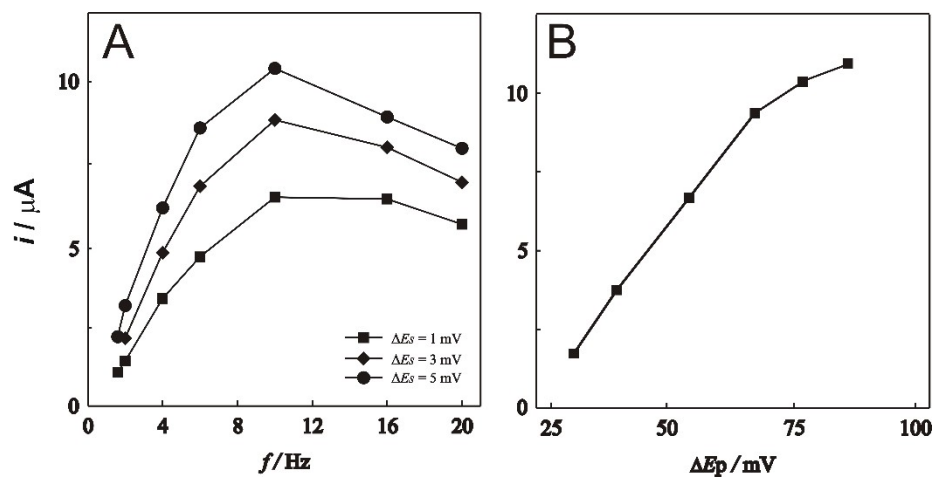

**Figure S3.** Effect of the electrochemical parameters on peak current for SWV on GCE|1 electrode in 0.1 mol dm<sup>-3</sup> solution of KCl (pH 6.0) containing 0.1 mM of dopamine: (A) frequency ( $f$ ) with different potential increment ( $\Delta E_s$ ); (B) pulse height ( $\Delta E_p$ ).

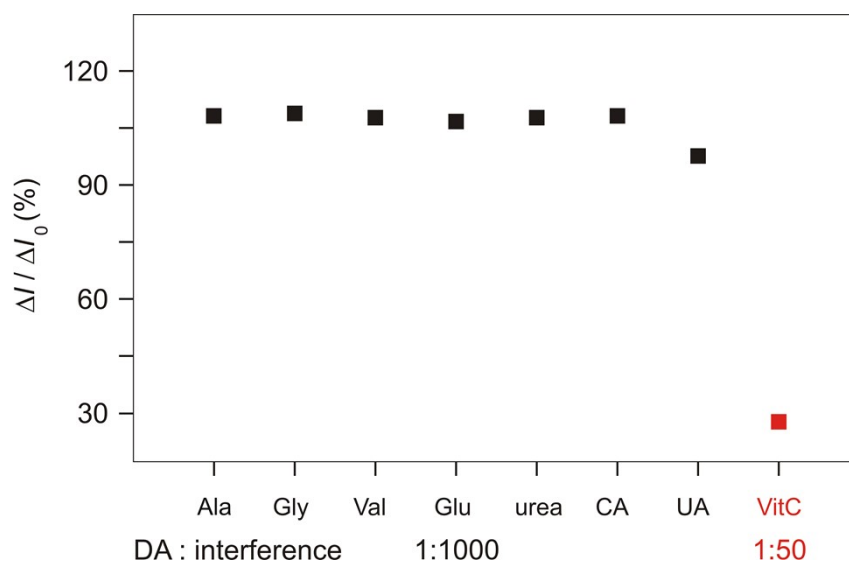

**Figure S4.** The relationship of interference current response ( $\Delta I$ ) relative to DA current response ( $\Delta I_0$ ).
